# Supplementary material for: Efficient Bayesian estimates for discrimination among topologically different systems biology models
Source: Royal Society of Chemistry journal article supplement (doi:10.1039/c4mb00276h), 2014-11-21
Supplement: c4mb00276h1.pdf [file c4mb00276h1.pdf]

## Appendix 1

Below is the derivation that the standard form of the marginal likelihood expressed as a normal distribution

$$p_{y|m}(y|m) = N\left(y, A(m) \cdot \bar{\theta}(m) + b(m), V_y + A(m) \cdot V_\theta(m) \cdot A(m)^T\right) \quad (10)$$

can be expressed as a product of the likelihood evaluated at the best-fit parameter set, the prior evaluated at the best-fit parameter set, and an expression containing the determinant of the posterior variance

$$p_{y|m}(y|m) = p_{y|\theta,m}(y|\tilde{\theta}(y,m),m) \cdot p_{\theta|m}(\tilde{\theta}(y,m)|m) \cdot \|2 \cdot \pi \cdot V_{\tilde{\theta}}(y,m)\|^{1/2} \quad (11)$$

For brevity, the arguments for  $A(m)$ ,  $\bar{\theta}(m)$ ,  $\tilde{\theta}(y,m)$ ,  $V_{\tilde{\theta}}(m)$ , and  $V_{\tilde{\theta}}(m)$  will be elided and  $2 \cdot \pi$  will be replaced by  $\tau$ . Furthermore,  $b(m)$  will be elided because  $y$  can always be redefined as the difference between the data and the intercept.

Expanding Equation 11 with the equivalent expressions for the likelihood (Equation 7) and prior (Equation 8) gives:

$$p_{y|m}(y|m) = \|\tau \cdot V_y\|^{1/2} \cdot \exp\left(-\frac{1}{2} \cdot (y - A \cdot \tilde{\theta})^T \cdot V_y^{-1} \cdot (y - A \cdot \tilde{\theta})\right) \cdot \|\tau \cdot V_\theta\|^{-1/2} \cdot \exp\left(-\frac{1}{2} \cdot (\tilde{\theta} - \bar{\theta})^T \cdot V_\theta^{-1} \cdot (\tilde{\theta} - \bar{\theta})\right) \cdot \|\tau \cdot V_{\tilde{\theta}}\|^{1/2} \quad (A1)$$

Combining the exponential terms under one exponential gives:

$$p_{y|m}(y|m) = \|\tau \cdot V_y\|^{1/2} \cdot \|\tau \cdot V_\theta\|^{-1/2} \cdot \|\tau \cdot V_{\tilde{\theta}}\|^{1/2} \cdot \exp\left(-\frac{1}{2} \cdot \left((y - A \cdot \tilde{\theta})^T \cdot V_y^{-1} \cdot (y - A \cdot \tilde{\theta}) + (\tilde{\theta} - \bar{\theta})^T \cdot V_\theta^{-1} \cdot (\tilde{\theta} - \bar{\theta})\right)\right) \quad (A2)$$

This equation will be considered in two parts: the product of determinants in the front:

$$\|\tau \cdot V_y\|^{1/2} \cdot \|\tau \cdot V_\theta\|^{-1/2} \cdot \|\tau \cdot V_{\tilde{\theta}}\|^{1/2} \quad (A3)$$

and the sum in the exponential:

$$\left(y - A \cdot \tilde{\theta}\right)^T \cdot V_y^{-1} \cdot \left(y - A \cdot \tilde{\theta}\right) + \left(\tilde{\theta} - \bar{\theta}\right)^T \cdot V_\theta^{-1} \cdot \left(\tilde{\theta} - \bar{\theta}\right) \quad (\text{A4})$$

The maximum a posteriori parameter set has the following definition for linear Gaussian models:

$$\tilde{\theta}(y, m) = V_{\tilde{\theta}} \cdot \left(A^T \cdot V_y^{-1} \cdot (y - b) + V_\theta^{-1} \cdot \bar{\theta}\right) \quad (\text{A5})$$

Replacing  $\tilde{\theta}$  in Equation A4 with its definition (Equation A5) gives:

$$\begin{aligned} & \left(y - A \cdot V_{\tilde{\theta}} \cdot \left(A^T \cdot V_y^{-1} \cdot (y - b) + V_\theta^{-1} \cdot \bar{\theta}\right)\right)^T \cdot V_y^{-1} \cdot \left(y - A \cdot V_{\tilde{\theta}} \cdot \left(A^T \cdot V_y^{-1} \cdot (y - b) + V_\theta^{-1} \cdot \bar{\theta}\right)\right) \\ & + \left(V_{\tilde{\theta}} \cdot \left(A^T \cdot V_y^{-1} \cdot (y - b) + V_\theta^{-1} \cdot \bar{\theta}\right) - \bar{\theta}\right)^T \cdot V_\theta^{-1} \cdot \left(V_{\tilde{\theta}} \cdot \left(A^T \cdot V_y^{-1} \cdot (y - b) + V_\theta^{-1} \cdot \bar{\theta}\right) - \bar{\theta}\right) \end{aligned} \quad (\text{A6})$$

Expanding those terms gives:

$$\begin{aligned} & y^T \cdot V_y^{-1} \cdot y \\ & - 2 \cdot y^T \cdot V_y^{-1} \cdot A \cdot \left(A^T \cdot V_y^{-1} \cdot A + V_\theta^{-1}\right)^{-1} \cdot \left(A^T \cdot V_y^{-1} \cdot y + V_\theta^{-1} \cdot \bar{\theta}\right) \\ & + \left(A^T \cdot V_y^{-1} \cdot y + V_\theta^{-1} \cdot \bar{\theta}\right)^T \cdot \left(A^T \cdot V_y^{-1} \cdot A + V_\theta^{-1}\right)^{-1} \cdot A^T \cdot V_y^{-1} \cdot A \cdot \left(A^T \cdot V_y^{-1} \cdot A + V_\theta^{-1}\right)^{-1} \cdot \left(A^T \cdot V_y^{-1} \cdot y + V_\theta^{-1} \cdot \bar{\theta}\right) \\ & + \bar{\theta}^T \cdot V_\theta^{-1} \cdot \bar{\theta} \\ & - 2 \cdot \bar{\theta}^T \cdot V_\theta^{-1} \cdot \left(A^T \cdot V_y^{-1} \cdot A + V_\theta^{-1}\right)^{-1} \cdot \left(A^T \cdot V_y^{-1} \cdot y + V_\theta^{-1} \cdot \bar{\theta}\right) \\ & + \left(A^T \cdot V_y^{-1} \cdot y + V_\theta^{-1} \cdot \bar{\theta}\right)^T \cdot \left(A^T \cdot V_y^{-1} \cdot A + V_\theta^{-1}\right)^{-1} \cdot V_\theta^{-1} \cdot \left(A^T \cdot V_y^{-1} \cdot A + V_\theta^{-1}\right)^{-1} \cdot \left(A^T \cdot V_y^{-1} \cdot y + V_\theta^{-1} \cdot \bar{\theta}\right) \end{aligned} \quad (\text{A7})$$

Expanding those terms further gives:

$$\begin{aligned}
& y^T \cdot V_y^{-1} \cdot y \\
& -2 \cdot y^T \cdot V_y^{-1} \cdot A \cdot (A^T \cdot V_y^{-1} \cdot A + V_\theta^{-1})^{-1} \cdot A^T \cdot V_y^{-1} \cdot y \\
& -2 \cdot y^T \cdot V_y^{-1} \cdot A \cdot (A^T \cdot V_y^{-1} \cdot A + V_\theta^{-1})^{-1} \cdot V_\theta^{-1} \cdot \bar{\theta} \\
& + y^T \cdot V_y^{-1} \cdot A \cdot (A^T \cdot V_y^{-1} \cdot A + V_\theta^{-1})^{-1} \cdot A^T \cdot V_y^{-1} \cdot A \cdot (A^T \cdot V_y^{-1} \cdot A + V_\theta^{-1})^{-1} \cdot A^T \cdot V_y^{-1} \cdot y \\
& + 2 \cdot y^T \cdot V_y^{-1} \cdot A \cdot (A^T \cdot V_y^{-1} \cdot A + V_\theta^{-1})^{-1} \cdot A^T \cdot V_y^{-1} \cdot A \cdot (A^T \cdot V_y^{-1} \cdot A + V_\theta^{-1})^{-1} \cdot V_\theta^{-1} \cdot \bar{\theta} \\
& + \bar{\theta}^T \cdot V_\theta^{-1} \cdot (A^T \cdot V_y^{-1} \cdot A + V_\theta^{-1})^{-1} \cdot A^T \cdot V_y^{-1} \cdot A \cdot (A^T \cdot V_y^{-1} \cdot A + V_\theta^{-1})^{-1} \cdot V_\theta^{-1} \cdot \bar{\theta} \\
& + \bar{\theta}^T \cdot V_\theta^{-1} \cdot \bar{\theta} \\
& -2 \cdot \bar{\theta}^T \cdot V_\theta^{-1} \cdot (A^T \cdot V_y^{-1} \cdot A + V_\theta^{-1})^{-1} \cdot A^T \cdot V_y^{-1} \cdot y \\
& -2 \cdot \bar{\theta}^T \cdot V_\theta^{-1} \cdot (A^T \cdot V_y^{-1} \cdot A + V_\theta^{-1})^{-1} \cdot V_\theta^{-1} \cdot \bar{\theta} \\
& + y^T \cdot V_y^{-1} \cdot A \cdot (A^T \cdot V_y^{-1} \cdot A + V_\theta^{-1})^{-1} \cdot V_\theta^{-1} \cdot (A^T \cdot V_y^{-1} \cdot A + V_\theta^{-1})^{-1} \cdot A^T \cdot V_y^{-1} \cdot y \\
& + 2 \cdot y^T \cdot V_y^{-1} \cdot A \cdot (A^T \cdot V_y^{-1} \cdot A + V_\theta^{-1})^{-1} \cdot V_\theta^{-1} \cdot (A^T \cdot V_y^{-1} \cdot A + V_\theta^{-1})^{-1} \cdot V_\theta^{-1} \cdot \bar{\theta} \\
& + \bar{\theta}^T \cdot V_\theta^{-1} \cdot (A^T \cdot V_y^{-1} \cdot A + V_\theta^{-1})^{-1} \cdot V_\theta^{-1} \cdot (A^T \cdot V_y^{-1} \cdot A + V_\theta^{-1})^{-1} \cdot V_\theta^{-1} \cdot \bar{\theta}
\end{aligned} \tag{A8}$$

We will group each term according to whether it is quadratic, linear, or constant with respect to  $y$ .

### *Quadratic terms*

Collecting the four terms from Equation A8 that are quadratic with respect to  $y$  and factoring  $y$  from the front and back gives:

$$y \cdot \begin{pmatrix} V_y^{-1} \\ -2 \cdot V_y^{-1} \cdot A \cdot (A^T \cdot V_y^{-1} \cdot A + V_\theta^{-1})^{-1} \cdot A^T \cdot V_y^{-1} \\ + V_y^{-1} \cdot A \cdot (A^T \cdot V_y^{-1} \cdot A + V_\theta^{-1})^{-1} \cdot A^T \cdot V_y^{-1} \cdot A \cdot (A^T \cdot V_y^{-1} \cdot A + V_\theta^{-1})^{-1} \cdot A^T \cdot V_y^{-1} \\ + V_y^{-1} \cdot A \cdot (A^T \cdot V_y^{-1} \cdot A + V_\theta^{-1})^{-1} \cdot V_\theta^{-1} \cdot (A^T \cdot V_y^{-1} \cdot A + V_\theta^{-1})^{-1} \cdot A^T \cdot V_y^{-1} \end{pmatrix} \cdot y \tag{A9}$$

Factoring the  $-A^T \cdot V_y^{-1}$  term from the front and  $A^T \cdot V_y^{-1}$  from the back of the second,

third, and fourth terms of the sum gives:

$$y \cdot \left( \begin{array}{c} V_y^{-1} \\ -V_y^{-1} \cdot A \cdot \left( \begin{array}{c} 2 \cdot (A^T \cdot V_y^{-1} \cdot A + V_\theta^{-1})^{-1} \\ -(A^T \cdot V_y^{-1} \cdot A + V_\theta^{-1})^{-1} \cdot A^T \cdot V_y^{-1} \cdot A \cdot (A^T \cdot V_y^{-1} \cdot A + V_\theta^{-1})^{-1} \\ -(A^T \cdot V_y^{-1} \cdot A + V_\theta^{-1})^{-1} \cdot V_\theta^{-1} \cdot (A^T \cdot V_y^{-1} \cdot A + V_\theta^{-1})^{-1} \end{array} \right) \cdot A^T \cdot V_y^{-1} \end{array} \right) \cdot y \quad (\text{A10})$$

Factoring  $(A^T \cdot V_y^{-1} \cdot A + V_\theta^{-1})^{-1}$  from the front and back of the third and fourth terms to

collapse the third and fourth terms together gives:

$$y \cdot \left( \begin{array}{c} V_y^{-1} \\ -V_y^{-1} \cdot A \cdot \left( \begin{array}{c} 2 \cdot (A^T \cdot V_y^{-1} \cdot A + V_\theta^{-1})^{-1} \\ -(A^T \cdot V_y^{-1} \cdot A + V_\theta^{-1})^{-1} \cdot (A^T \cdot V_y^{-1} \cdot A + V_\theta^{-1}) \cdot (A^T \cdot V_y^{-1} \cdot A + V_\theta^{-1})^{-1} \end{array} \right) \cdot A^T \cdot V_y^{-1} \end{array} \right) \cdot y \quad (\text{A11})$$

Cancelling  $(A^T \cdot V_y^{-1} \cdot A + V_\theta^{-1})^{-1} \cdot (A^T \cdot V_y^{-1} \cdot A + V_\theta^{-1})$  in the third term gives:

$$y \cdot \left( \begin{array}{c} V_y^{-1} \\ -V_y^{-1} \cdot A \cdot \left( \begin{array}{c} 2 \cdot (A^T \cdot V_y^{-1} \cdot A + V_\theta^{-1})^{-1} \\ -(A^T \cdot V_y^{-1} \cdot A + V_\theta^{-1})^{-1} \end{array} \right) \cdot A^T \cdot V_y^{-1} \end{array} \right) \cdot y \quad (\text{A12})$$

Collapsing the second and third terms which now have the same form gives:

$$y \cdot \left( V_y^{-1} - V_y^{-1} \cdot A \cdot (A^T \cdot V_y^{-1} \cdot A + V_\theta^{-1})^{-1} \cdot A^T \cdot V_y^{-1} \right) \cdot y \quad (\text{A13})$$

Finally, applying the Woodbury identity gives:

$$y \cdot (V_y + A \cdot V_\theta \cdot A^T)^{-1} \cdot y \quad (\text{A14})$$

*Linear terms*

Collecting from Equation A8 the terms that are linear with respect to  $y$  and factoring

$-2 \cdot y^T \cdot V_y^{-1} \cdot A$  from the front and  $V_\theta^{-1} \cdot \bar{\theta}$  from the back gives:

$$-2 \cdot y^T \cdot V_y^{-1} \cdot A \cdot \begin{pmatrix} \left( A^T \cdot V_y^{-1} \cdot A + V_\theta^{-1} \right)^{-1} \\ - \left( A^T \cdot V_y^{-1} \cdot A + V_\theta^{-1} \right)^{-1} \cdot A^T \cdot V_y^{-1} \cdot A \cdot \left( A^T \cdot V_y^{-1} \cdot A + V_\theta^{-1} \right)^{-1} \\ + \left( A^T \cdot V_y^{-1} \cdot A + V_\theta^{-1} \right)^{-1} \\ - \left( A^T \cdot V_y^{-1} \cdot A + V_\theta^{-1} \right)^{-1} \cdot V_\theta^{-1} \cdot \left( A^T \cdot V_y^{-1} \cdot A + V_\theta^{-1} \right)^{-1} \end{pmatrix} \cdot V_\theta^{-1} \cdot \bar{\theta} \quad (\text{A15})$$

Collapsing the first and third terms which have the same form gives:

$$-2 \cdot y^T \cdot V_y^{-1} \cdot A \cdot \begin{pmatrix} 2 \left( A^T \cdot V_y^{-1} \cdot A + V_\theta^{-1} \right)^{-1} \\ - \left( A^T \cdot V_y^{-1} \cdot A + V_\theta^{-1} \right)^{-1} \cdot A^T \cdot V_y^{-1} \cdot A \cdot \left( A^T \cdot V_y^{-1} \cdot A + V_\theta^{-1} \right)^{-1} \\ - \left( A^T \cdot V_y^{-1} \cdot A + V_\theta^{-1} \right)^{-1} \cdot V_\theta^{-1} \cdot \left( A^T \cdot V_y^{-1} \cdot A + V_\theta^{-1} \right)^{-1} \end{pmatrix} \cdot V_\theta^{-1} \cdot \bar{\theta} \quad (\text{A16})$$

Factoring  $\left( A^T \cdot V_y^{-1} \cdot A + V_\theta^{-1} \right)^{-1}$  from the second and third terms gives:

$$-2 \cdot y^T \cdot V_y^{-1} \cdot A \cdot \begin{pmatrix} 2 \left( A^T \cdot V_y^{-1} \cdot A + V_\theta^{-1} \right)^{-1} \\ - \left( A^T \cdot V_y^{-1} \cdot A + V_\theta^{-1} \right)^{-1} \cdot \left( A^T \cdot V_y^{-1} \cdot A + V_\theta^{-1} \right) \cdot \left( A^T \cdot V_y^{-1} \cdot A + V_\theta^{-1} \right)^{-1} \end{pmatrix} \cdot V_\theta^{-1} \cdot \bar{\theta} \quad (\text{A17})$$

Cancelling  $\left( A^T \cdot V_y^{-1} \cdot A + V_\theta^{-1} \right)^{-1} \cdot \left( A^T \cdot V_y^{-1} \cdot A + V_\theta^{-1} \right)$  in the second term gives:

$$-2 \cdot y^T \cdot V_y^{-1} \cdot A \cdot \begin{pmatrix} 2 \left( A^T \cdot V_y^{-1} \cdot A + V_\theta^{-1} \right)^{-1} \\ - \left( A^T \cdot V_y^{-1} \cdot A + V_\theta^{-1} \right)^{-1} \end{pmatrix} \cdot V_\theta^{-1} \cdot \bar{\theta} \quad (\text{A18})$$

Collapsing the first and second terms which now have the same form gives:

$$-2 \cdot y^T \cdot V_y^{-1} \cdot A \cdot \left( A^T \cdot V_y^{-1} \cdot A + V_\theta^{-1} \right)^{-1} \cdot V_\theta^{-1} \cdot \bar{\theta} \quad (\text{A19})$$

Transforming  $V_y^{-1} \cdot A \cdot (A^T \cdot V_y^{-1} \cdot A + V_\theta^{-1})^{-1}$  with the positive definite variant of the

Woodbury identity gives:

$$-2 \cdot y^T \cdot (V_y + A \cdot V_\theta \cdot A^T)^{-1} \cdot A \cdot V_\theta \cdot V_\theta^{-1} \cdot \bar{\theta} \quad (\text{A20})$$

Cancelling  $V_\theta \cdot V_\theta^{-1}$  gives:

$$-2 \cdot y^T \cdot (V_y + A \cdot V_\theta \cdot A^T)^{-1} \cdot A \cdot \bar{\theta} \quad (\text{A21})$$

*Constant terms*

Collecting from Equation A8 the terms that are not functions of  $\hat{y}$  and factoring  $\bar{\theta}$  from the front and back gives:

$$\bar{\theta}^T \cdot \left( \begin{array}{c} V_\theta^{-1} \\ -2 \cdot V_\theta^{-1} \cdot (A^T \cdot V_y^{-1} \cdot A + V_\theta^{-1})^{-1} \cdot V_\theta^{-1} \\ + V_\theta^{-1} \cdot (A^T \cdot V_y^{-1} \cdot A + V_\theta^{-1})^{-1} \cdot A^T \cdot V_y^{-1} \cdot A \cdot (A^T \cdot V_y^{-1} \cdot A + V_\theta^{-1})^{-1} \cdot V_\theta^{-1} \\ + V_\theta^{-1} \cdot (A^T \cdot V_y^{-1} \cdot A + V_\theta^{-1})^{-1} \cdot V_\theta^{-1} \cdot (A^T \cdot V_y^{-1} \cdot A + V_\theta^{-1})^{-1} \cdot V_\theta^{-1} \end{array} \right) \cdot \bar{\theta} \quad (\text{A22})$$

Factoring  $-V_\theta^{-1}$  from the front and  $V_\theta^{-1}$  from the back of the second, third, and fourth terms gives:

$$\bar{\theta}^T \cdot \left( \begin{array}{c} V_\theta^{-1} \\ -V_\theta^{-1} \cdot \left( \begin{array}{c} 2 \cdot (A^T \cdot V_y^{-1} \cdot A + V_\theta^{-1})^{-1} \\ -(A^T \cdot V_y^{-1} \cdot A + V_\theta^{-1})^{-1} \cdot A^T \cdot V_y^{-1} \cdot A \cdot (A^T \cdot V_y^{-1} \cdot A + V_\theta^{-1})^{-1} \\ -(A^T \cdot V_y^{-1} \cdot A + V_\theta^{-1})^{-1} \cdot V_\theta^{-1} \cdot (A^T \cdot V_y^{-1} \cdot A + V_\theta^{-1})^{-1} \end{array} \right) \cdot V_\theta^{-1} \end{array} \right) \cdot \bar{\theta} \quad (\text{A23})$$

Factoring  $(A^T \cdot V_y^{-1} \cdot A + V_\theta^{-1})^{-1}$  from the front and back of the third and fourth terms

gives:

$$\bar{\theta}^T \cdot \left( \begin{array}{c} V_\theta^{-1} \\ -V_\theta^{-1} \cdot \left( \begin{array}{c} 2 \cdot (A^T \cdot V_y^{-1} \cdot A + V_\theta^{-1})^{-1} \\ -(A^T \cdot V_y^{-1} \cdot A + V_\theta^{-1})^{-1} \cdot (A^T \cdot V_y^{-1} \cdot A + V_\theta^{-1}) \cdot (A^T \cdot V_y^{-1} \cdot A + V_\theta^{-1})^{-1} \end{array} \right) \cdot V_\theta^{-1} \end{array} \right) \cdot \bar{\theta} \quad (\text{A24})$$

Canceling  $(A^T \cdot V_y^{-1} \cdot A + V_\theta^{-1})^{-1} \cdot (A^T \cdot V_y^{-1} \cdot A + V_\theta^{-1})$  in the third term gives:

$$\bar{\theta}^T \cdot \left( \begin{array}{c} V_\theta^{-1} \\ -V_\theta^{-1} \cdot \left( \begin{array}{c} 2 \cdot (A^T \cdot V_y^{-1} \cdot A + V_\theta^{-1})^{-1} \\ -(A^T \cdot V_y^{-1} \cdot A + V_\theta^{-1})^{-1} \end{array} \right) \cdot V_\theta^{-1} \end{array} \right) \cdot \bar{\theta} \quad (\text{A25})$$

Collapsing the second and third terms which now have the same form gives:

$$\bar{\theta}^T \cdot \left( V_\theta^{-1} - V_\theta^{-1} \cdot (A^T \cdot V_y^{-1} \cdot A + V_\theta^{-1})^{-1} \cdot V_\theta^{-1} \right) \cdot \bar{\theta} \quad (\text{A26})$$

Applying the Woodbury identity to  $V_\theta^{-1} - V_\theta^{-1} \cdot (A^T \cdot V_y^{-1} \cdot A + V_\theta^{-1})^{-1} \cdot V_\theta^{-1}$  gives:

$$\bar{\theta}^T \cdot A^T \cdot (V_y + AV_\theta A^T)^{-1} \cdot A \cdot \bar{\theta} \quad (\text{A27})$$

### *Determinant terms*

Combining all determinant terms from Equation A3 under a single exponent gives:

$$\left( \|\tau \cdot V_y\| \cdot \|\tau \cdot V_\theta\| \cdot \|\tau \cdot V_\theta\|^{-1} \right)^{\frac{1}{2}} \quad (\text{A28})$$

Pulling out  $\tau$  from each determinant gives:

$$\left( \tau^{n_y} \cdot \|V_y\| \cdot \tau^{n_\theta} \cdot \|V_\theta\| \cdot \tau^{-n_\theta} \cdot \|V_\theta\|^{-1} \right)^{\frac{1}{2}} \quad (\text{A29})$$

Cancelling  $\tau^{n_\theta} \cdot \tau^{-n_\theta}$  gives:

$$\left( \tau^{n_y} \cdot \|V_y\| \cdot \|V_\theta\| \cdot \|V_{\bar{\theta}}\|^{-1} \right)^{\frac{1}{2}} \quad (\text{A30})$$

The posterior variance for a linear Gaussian model given by:

$$V_{\bar{\theta}} = \left( A^T \cdot V_y^{-1} \cdot A + V_\theta^{-1} \right)^{-1} \quad (\text{A31})$$

Replacing  $V_{\bar{\theta}}$  in Equation A30 with its linear definition (Equation A31) gives:

$$\left( \tau^{n_y} \cdot \|V_y\| \cdot \|V_\theta\| \cdot \left\| \left( A^T \cdot V_y^{-1} \cdot A + V_\theta^{-1} \right)^{-1} \right\|^{-1} \right)^{\frac{1}{2}} \quad (\text{A32})$$

Cancelling the stacked negative exponents gives:

$$\left( \tau^{n_y} \cdot \|V_y\| \cdot \|V_\theta\| \cdot \|A^T \cdot V_y^{-1} \cdot A + V_\theta^{-1}\| \right)^{\frac{1}{2}} \quad (\text{A33})$$

Applying a determinant identity gives:

$$\left( \tau^{n_y} \cdot \|V_y + A \cdot V_\theta \cdot A^T\| \right)^{\frac{1}{2}} \quad (\text{A34})$$

Finally, bringing the  $\tau$  back into the determinant gives:

$$\left\| \tau (V_y + A \cdot V_\theta \cdot A^T) \right\|^{-\frac{1}{2}} \quad (\text{A35})$$

### *Recombination*

Recombining the simplified quadratic (Equation A14), linear (Equation A21), and constant (Equation A27) expressions, which together equal Equation A8, gives:

$$y \cdot (V_y + A \cdot V_\theta \cdot A^T)^{-1} \cdot y - 2 \cdot y^T \cdot (V_y + A \cdot V_\theta \cdot A^T)^{-1} \cdot A \cdot \bar{\theta} + \bar{\theta}^T \cdot A^T \cdot (V_y + A \cdot V_\theta \cdot A^T)^{-1} \cdot A \cdot \bar{\theta} \quad (\text{A36})$$



Factoring the quadratic equation gives:

$$(y - A \cdot \bar{\theta})^T \cdot (V_y + A \cdot V_\theta \cdot A^T)^{-1} \cdot (y - A \cdot \bar{\theta}) \quad (\text{A37})$$

Replacing the simplified determinant (Equation A35) and the simplified quadratic equation (Equation A37) in Equation A2 gives:

$$p_{y|m}(y|m) = \|\tau \cdot (V_y + A \cdot V_\theta \cdot A^T)\|^{-\frac{1}{2}} \cdot \exp\left(-\frac{1}{2} \cdot (y - A \cdot \bar{\theta})^T \cdot (V_y + A \cdot V_\theta \cdot A^T)^{-1} \cdot (y - A \cdot \bar{\theta})\right) \quad (\text{A38})$$

Given that the probability density function of a normal distribution is:

$$N(x, \mu, V) = \|\tau \cdot V\|^{-\frac{1}{2}} \cdot \exp\left(-\frac{1}{2} \cdot (x - \mu)^T \cdot V^{-1} \cdot (x - \mu)\right) \quad (\text{A39})$$

it is clear that the linearization formula (Equation 11) is equivalent to a normal distribution of variable  $y$  with a mean of  $A \cdot \bar{\theta}$  and a variance of  $V_y + A \cdot V_\theta \cdot A^T$ , which is the standard marginal likelihood given in Equation 10.
